1 **CART neuropeptide modulates the extended amygdalar CeA-vBNST**  
2 **circuit to gate expression of innate fear**

3

4 Abhishek Rale, Ninad Shendye, Devika S Bodas, Nishikant Subhedar \* and  
5 Aurnab Ghose \*

6

7 Indian Institute of Science Education and Research (IISER)

8 Dr Homi Bhabha Road, Pune 411008, India.

9

10 Running title: CART modulates expression of innate fear

11

12 Keywords: Innate fear; Fear circuitry; TMT; CART neuropeptide; Amygdala;  
13 BNST

14

15 \* Correspondence:

16 Dr Nishikant Subhedar, Indian Institute of Science Education and Research  
17 (IISER), Dr Homi Bhabha Road, Pune 411008, India.

18 Tel: +91 20 25908055; Email: [subhedar@iiserpune.ac.in](mailto:subhedar@iiserpune.ac.in)

19 Dr Aurnab Ghose, Indian Institute of Science Education and Research  
20 (IISER), Dr Homi Bhabha Road, Pune 411008, India.

21 Tel: +91 20 25908058; Email: [aur nab@iiserpune.ac.in](mailto:aur nab@iiserpune.ac.in)

22

23 **ABSTRACT**

24 Innate fear is critical for the survival of animals and is under tight homeostatic  
25 control. Deregulation of innate fear processing is thought to underlie  
26 pathological phenotypes including, phobias and panic disorders. Although  
27 central processing of conditioned fear has been extensively studied, the  
28 circuitry and regulatory mechanisms subserving innate fear remain relatively  
29 poorly defined.

30 In this study, we identify cocaine- and amphetamine-regulated transcript  
31 (CART) neuropeptide signaling in the central amygdala (CeA) - ventral bed  
32 nucleus of stria terminalis (vBNST) axis as a key modulator of innate fear  
33 expression. 2,4,5-trimethyl-3-thiazoline (TMT), a component of fox faeces,  
34 induces a freezing response whose intensity is regulated by the extent of  
35 CART-signaling in the CeA neurons. Abrogation of CART activity in the CeA  
36 attenuates the freezing response and reduces activation of vBNST neurons.  
37 Conversely, ectopically elevated CART signaling in the CeA potentiates the  
38 fear response concomitant with enhanced vBNST activation. We show that  
39 local levels of CART signaling modulate the activation of CeA neurons by  
40 NMDA receptor-mediated glutamatergic inputs, in turn, regulating activity in  
41 the vBNST.

42 This study identifies the extended amygdalar CeA-vBNST circuit as a CART  
43 modulated axis encoding innate fear. CART signaling regulates the  
44 glutamatergic excitatory drive in the CeA-vBNST circuit, in turn, gating the  
45 expression of the freezing response to TMT.

46

## 47 **1. Introduction**

48 Exposure to threatening stimuli evokes a constellation of responses  
49 aimed at self-preservation. Genetically ingrained mechanisms engender  
50 spontaneous fear, independent of earlier experience, and offer a unique  
51 opportunity to dissect an emotion – from its arousal to behavioral end point.  
52 While the onset, intensity, persistence and extinction kinetics of these innate  
53 responses are tightly regulated, dysregulation of the underlying system may  
54 lead to neurological conditions like post-traumatic stress disorders, phobias  
55 and panic disorders. Unimodal predator cues, like 2,4,5-trimethyl-3-thiazoline  
56 (TMT; an ethologically relevant fear-inducing odorant derived from fox faeces)  
57 have been used to delineate the neuroanatomical underpinnings of innate fear  
58 (Day et al., 2004; Rosen et al., 2015; Silva et al., 2016; Takahashi, 2014).

59 TMT is sensed by discrete neurons of the nasal epithelium and  
60 Gruenberg ganglia, which project to the main olfactory bulb as well as the  
61 accessory olfactory bulb (Brechbuhl et al., 2013; Kobayakawa et al., 2007;  
62 Matsumoto et al., 2010). Downstream to the medial or accessory olfactory  
63 bulbs, the TMT generated information is known to transit via the cortical  
64 nucleus of the amygdala (CoA) (Root et al., 2014) and medial nucleus of the  
65 amygdala (MeA) (Muller and Fendt, 2006). How the information transits from  
66 the CoA/MeA to motor output areas like the periaqueductal grey (PAG)  
67 remains unclear. A possible route may involve central nucleus of the  
68 amygdala (CeA) – ventral bed nucleus of the stria terminalis (vBNST)  
69 connectivity that, in turn, communicates to the PAG possibly via specific  
70 hypothalamic nodes (Motta et al., 2009; Pagani and Rosen, 2009). A tight  
71 coordination between the CeA and BNST is emerging as a major regulatory

72 node in the processing of fear and anxiety in rodents and primates (Fox et al.,  
73 2015; Shackman and Fox, 2016). Previous studies based on rodents as well  
74 as primates implicate CeA in a variety of fear responses triggered by predator  
75 or predator cues (Day et al., 2004; Kalin et al., 2004). Suppression of activity  
76 of serotonin-2A receptor expressing neurons of the CeA has been shown to  
77 mediate innate fear induced by an artificial TMT-derivative (Isosaka et al.,  
78 2015). Exposure to ferret resulted in an increase in the secretion of CRF in  
79 the CeA of rat (Merali et al., 2001). Studies from our laboratory and others  
80 implicate neuronal activation in the CeA in response to TMT (Butler et al.,  
81 2011; Sharma et al., 2014), while silencing of the vBNST by muscimol  
82 abolished TMT-induced freezing (Fendt et al., 2003).

83 In contrast to conditioned fear, our understanding of the modulatory  
84 control of innate fear is limited. The amygdalar circuitry has emerged as a  
85 central regulatory hub for conditioned fear. A range of agents, inclusive of  
86 fast-acting neurotransmitters like GABA, glutamate, dopamine and serotonin  
87 and neuropeptides like corticotropin-releasing factor (CRH), opioid peptides,  
88 neuropeptide Y, thyrotropin-releasing hormone, calcitonin gene-related  
89 peptide and vasopressin influence fear conditioning (Davis and Whalen, 2001;  
90 Schulkin et al., 2005; Shionoya et al., 2013; Spannuth et al., 2011; Tasan et  
91 al., 2016). However, little is known about the modulatory processes  
92 associated with innate fear. CRF, somatostatin and opioids have been  
93 implicated in innate fear processing (Asok et al., 2013; Asok et al., 2016;  
94 Figueiredo et al., 2003; Nanda et al., 2008; Roseboom et al., 2007; Wilson  
95 and Junor, 2008), and the underlying modes of action and neuroanatomical  
96 substrates are just beginning to be understood.



97           Studies from our laboratory have implicated the neuropeptide CART as  
98   an important player in the processing of innate fear within the CeA. Exposure  
99   to cat or TMT induced robust freezing in rats, which was dependent on CART  
100   signaling (Sharma et al., 2014; Upadhyaya et al., 2013). In this study, we  
101   uncover a CART signaling-sensitive extended amygdalar CeA-vBNST  
102   circuitry in TMT-induced fear processing. CART potentiates NMDA-R-  
103   dependent excitatory drive in the CeA-vBNST axis and exerts regulatory  
104   control on TMT-induced freezing.  
105

## 106 **2. Materials and methods**

### 107 **2.1. Animals**

108 Adult male Sprague-Dawley rats weighing 200–220 g at the time of surgery  
109 were used. All the rats were maintained on a 12 hr light/dark cycle, at  
110 controlled room temperature of  $25 \pm 2^{\circ}$  C with food and water available *ad*  
111 *libitum*. The bedding of the cages was changed every week. In order to  
112 obviate novelty related stress, all rats were habituated for five days to  
113 handling, laboratory conditions and to the test chamber. All experimental  
114 protocols were approved by the Institutional Animal Ethical Committee (IAEC)  
115 constituted by the CPCSEA, Govt. of India.

### 116 **2.2. Surgery**

117 Stereotaxic surgery and implantation of cannula were carried out according to  
118 previously described protocols (Sharma et al., 2014). Briefly, the rats were  
119 anaesthetized with intraperitoneal (i.p.) ketamine (60 mg/kg, Aqua Fine  
120 Injecta, India) and xylazine (10 mg/kg, Stanex, India) injection. Hair depilator  
121 (Anne French, Wyeth, India) was applied to the head to remove hair. Each rat  
122 was mounted on the stereotaxic frame with blunt ear bars (Stoelting, USA)  
123 and a mid-sagittal incision was made in the scalp to expose the skull. Two  
124 stainless steel guide cannulae were implanted bilaterally targeted at the CeA  
125 using the stereotaxic coordinates  $-1.9$  mm caudal,  $\pm 4.0$  mm lateral and  $-7.8$   
126 mm ventral to the bregma and secured to the skull with anchoring screws and  
127 dental cement (DPI-RR cold cure, acrylic powder, Dental Products of India,  
128 India). After surgery and between testing, dummy cannulas were inserted into  
129 the guide cannulas to prevent occlusion. The animals were placed in separate

130 cages to avoid damage to the guide and dummy cannulae. All rats were  
131 allowed one week to recover prior to the start of behavioral testing. Only the  
132 rats showing quick recovery and no signs of infection were included in the  
133 study. The animals were divided randomly into different groups (n = 6 in each)  
134 and habituated to the testing environment for five days.

135 Post-necropsy, the brain sections were examined for proper placement of the  
136 cannulae (Supplementary Fig S1). The data drawn from the animals with both  
137 the cannulae in the target region were considered for analysis.

### 138 **2.3. Microinjections**

139 For microinjections, the injection cannulae (fabricated in-house; internal  
140 diameter 0.16 mm, outer diameter 0.31 mm) connected via PE-10  
141 polyethylene tubing to a microliter syringe (10  $\mu$ l, Hamilton, USA) and  
142 extending 0.5 mm beyond the guide cannulae (fabricated in house as  
143 described earlier (Kokare et al., 2011); internal diameter 0.36 mm, outer  
144 diameter 0.5 mm) targeting the CeA were used and rats were bilaterally  
145 administered different agents according to their treatment group. The control  
146 group was bilaterally injected with 0.5  $\mu$ l of artificial cerebrospinal fluid (aCSF;  
147 140 mM NaCl, 3.35 mM KCl, 1.26 mM CaCl<sub>2</sub>, 1.15 mM MgCl<sub>2</sub>, 0.3 mM  
148 NaH<sub>2</sub>PO<sub>4</sub>, 1.2 mM Na<sub>2</sub>HPO<sub>4</sub> (pH 7.4) over a period of 5 min. Similarly, other  
149 groups received different treatments such as non-immune serum (NIS; 0.1%  
150 bovine serum albumin in aCSF; 0.5  $\mu$ l/side); CART antibody (1:500 in NIS; 0.5  
151  $\mu$ l/side; gift from Drs. Lars Thim and Jes Clausen, Novo Nordisk, Denmark);  
152 CART peptide (10 ng in 0.25  $\mu$ l/side; gift from Drs. Lars Thim and Jes  
153 Clausen, Novo Nordisk, Denmark); lidocaine hydrochloride (2% solution;  
154 AstraZeneca) and MK 801, a non-competitive NMDAR antagonist (5  $\mu$ g in 0.5

155  $\mu$ l/side, diluted in aCSF; Tocris) bilaterally in the CeA. For administration of  
156 CART antibody, CART peptide or matching controls in the CeA, the animals  
157 were injected 15 mins prior to behavioral testing. MK801 and control aCSF  
158 were injected 5 mins prior to behavior testing, while lidocaine and buffered  
159 saline was injected 10 mins prior. For double injections, aCSF or MK801 was  
160 bilaterally injected into the CeA followed by a second bilateral injection of  
161 CART peptide after 5 mins. Behavioral tests were conducted 15 mins after the  
162 second injection.

163 An additional experiment was conducted to investigate the effect of CART  
164 treatment per se on the CeA neurons. Sodium thiopental (60 mg/ml; i.p.)  
165 anaesthetized rats were stereotactically injected with CART peptide (10 ng  
166 dissolved in 0.5  $\mu$ l aCSF) bilaterally in the CeA using a 31-gauge needle.  
167 Following an interval of 30 mins, the animals were perfused transcardially and  
168 subjected to immunofluorescence analysis (see below).

#### 169 **2.4. Exposure of rat to TMT and behavior assessment**

170 Behavioral tests were carried out as described earlier (Sharma et al., 2014).  
171 In this publication, we characterized the specificity of TMT to induce fear and  
172 neuronal activation in the CeA and the vBNST as opposed to butyric acid - a  
173 non-specific, aversive response to a noxious odorant. Briefly, rats were  
174 habituated to the Plexiglas test chamber having dimensions 8.6  $\times$  8.6  $\times$  20 cm  
175 (Wallace and Rosen, 2001) following recovery and equipped with two doors at  
176 opposite ends (8.6  $\times$  8.6 cm) each having a 6  $\times$  6 cm opening covered by the  
177 filter paper. The animals were habituated for 10 mins each day for 5 days. On  
178 the 6<sup>th</sup> day, fifteen minutes after the injections, two filter papers, each coated  
179 with 35  $\mu$ l of TMT were taped over the two openings and the rat was

180 introduced into the test chamber. The behavior of the rat was monitored for a  
181 period of 20 min. During the test period, the freezing behavior (absence of all  
182 movements except those required for respiration) was recorded and analysed  
183 using Noldus Ethovision video tracking system (Netherlands). During the test  
184 period, the videos were acquired at 8.33 frames per second. The analysis was  
185 conducted by averaging 20 frames. 5% change in body area was set as the  
186 threshold to quantify freezing behavior. The data acquisition was by a skilled  
187 individual blind to the treatments. The data on freezing are represented as  
188 percent of total recorded time.

## 189 **2.5. Immunohistochemistry**

190 The protocol described in our earlier study was employed (Sharma et al.,  
191 2014). Thirty minutes after TMT exposure, the rats were anesthetized (sodium  
192 thiopental; 60 mg/kg; i.p.) and perfused transcardially using saline followed by  
193 chilled 4% paraformaldehyde (PFA) in 0.1 M phosphate buffer (pH 7.4). The  
194 brains were post-fixed in 4% PFA overnight and transferred to 30% sucrose  
195 solution at 4°C for cryoprotection. The brains were serially sectioned on a  
196 cryostat in a coronal plane at the 30 µm thickness and stored in 50% glycerol  
197 in PBS at 4°C. Free- floating sections were rinsed in PBS, incubated in the  
198 blocking solution containing polyclonal anti-Fos antibody (1:1000, Santa Cruz,  
199 USA) for 24 h in a humid atmosphere at 4°C. The sections were then washed  
200 and incubated with anti-rabbit Alexa Fluor 488 secondary antibody (A-11008;  
201 Invitrogen, Carlsbad, CA) for 2 hr. Further, sections were mounted in a  
202 glycerol-based mounting medium (70% glycerol, 0.5% N-propyl-gallate, 20  
203 mM Tris, pH 8.0) containing 4,6-diamidino-2-phenylindole (DAPI; 0.01 mg/ml)  
204 and observed under an epifluorescence microscope (AxioImager Z1, Carl

205 Zeiss, Germany) or imaged using a laser scanning confocal microscope  
206 (Zeiss LSM 710, Carl Zeiss, Germany). ImageJ was used to adjust the size,  
207 contrast, and brightness of the micrographs. Inkscape (ver. 0.91) was used to  
208 prepare the panels and diagrammatic representations. In order to ensure  
209 reliable comparisons across different groups and maintain stringency in tissue  
210 preparation and staining conditions, all brain sections were processed  
211 concurrently under identical conditions.

## 212 **2.6. Morphometric analysis**

213 Morphometric analysis was carried out according to the protocol described in  
214 our earlier study (Sharma et al., 2014). Briefly, the number of Fos-expressing  
215 cells were counted from eight sections containing both the sides of vBNST  
216 and dIBNST regions (A.P -0.12 mm to -0.36 mm with reference to bregma),  
217 drawn from each of the six brains in each group (Supplementary Fig S1). The  
218 morphometric scoring was by a skilled individual blind to the treatments. The  
219 cell numbers were subjected to Abercrombie's correction to avoid  
220 overestimation using the equation  $N = (p \times T)/(T + d)$ , where  $N$  is the  
221 corrected cell number,  $T$  is the thickness of section,  $p$  is the actual profile  
222 count and  $d$  is the mean nuclear diameter.

## 223 **2.7. Statistical Analysis**

224 Behavior and morphometric data analyses were performed using Mann-  
225 Whitney test. All values are expressed as mean  $\pm$  SEM of the group and  
226 differences were considered significant at  $p < 0.05$ . Graphs were plotted using  
227 the GraphPad Prism 5.0 statistical software.

## 228 **3. Results**

### 229 **3.1. CART signaling in the CeA-vBNST circuit modulates expression of** 230 **TMT-induced innate fear**

231 As the extended amygdalar CeA-BNST circuit has been implicated in  
232 processing innate fear (Schulkin et al., 2005), we tested if CART signaling  
233 modulated the activity of this circuit following exposure to TMT. To directly test  
234 if CeA activity regulates innate fear and vBNST activation, we silenced CeA  
235 neurons by stereotaxically administering lidocaine in the CeA. Compared to  
236 controls, lidocaine injected animals showed reduced freezing in response to  
237 TMT (Fig 1A;  $p = 0.0022$ ;  $n = 6$ ). Our previous work had implicated activation  
238 of vBNST neurons by TMT (Sharma et al., 2014). Fos expression is a  
239 common surrogate readout of recent neuronal activation. We evaluated the  
240 activity of vBNST neurons, upon silencing of the CeA, employing induction of  
241 Fos. Lidocaine administration to the CeA was found to attenuate TMT-induced  
242 Fos activation in the vBNST neurons (Fig 1B-F;  $p = 0.0022$ ;  $n = 6$ ).

243 To test the contribution of CART signaling in processing TMT-induced innate  
244 fear responses at the CeA, immunoneutralization of endogenous CART  
245 activity was employed. Stereotactic delivery of neutralizing antibody against  
246 CART neuropeptide in the CeA of TMT-exposed rat attenuated the freezing  
247 response (Fig 2A;  $p = 0.0022$ ;  $n = 6$ ) compared to animals injected with the  
248 non-immune serum (NIS). This is along the lines of our previous report  
249 implicating CART activity in the CeA in processing TMT-induced fear  
250 responses (Sharma et al., 2014). We next tested if attenuation of CART  
251 signaling in the CeA impacted neural activation in the vBNST. Strikingly, rats  
252 injected with CART antibody in the CeA showed reduced Fos induction in the

253 vBNST in response to TMT compared to NIS injected animals (Fig 2B-F;  $p =$   
254 0.0043;  $n = 6$ ).

255 These results, in line with our previous reports (Sharma et al., 2014; Upadhy  
256 et al., 2013), confirm the role of CART in processing innate fear in the CeA.  
257 Further, we identify a circuitry involving CeA mediated activation of vBNST  
258 under the modulatory influence of CART neuropeptide in TMT-induced fear  
259 processing.

### 260 **3.2. Exogenous CART peptide in the CeA intensifies TMT-induced fear** 261 **responses and promotes vBNST activation**

262 To test the role of CART signaling in the CeA-vBNST circuit, CART peptide  
263 was administered stereotaxically to the CeA. Compared to aCSF treated  
264 animals, CART infused rats showed a significantly prolonged freezing  
265 response (Fig 3A;  $p = 0.0087$ ;  $n = 6$ ). Fos induction in the vBNST was  
266 increased in rats treated with exogenous CART peptide compared to those  
267 receiving aCSF in the CeA (Fig 3B-F;  $p = 0.0043$ ;  $n = 6$ ). These results  
268 highlight the importance of CART signaling in fear processing in the CeA-  
269 vBNST axis.

270 We also tested if exogenously applied CART peptide in the CeA could directly  
271 alter the excitability of the CeA-vBNST axis in the absences of TMT exposure.  
272 Number of Fos-positive neurons increased in both the CeA (Fig 3G;  
273  $p=0.0043$ ;  $n=6$ ) and the vBNST (Fig 3H;  $p = 0.0050$ ;  $n = 6$ ) when CART  
274 peptide was introduced even in the absence of TMT. However, no change in  
275 Fos immunoreactive cell population was observed in the dIBNST (Fig 3I;  $n =$   
276 6).



277 The data drawn from CART immunoneutralization, administration of CART  
278 peptide (with or without TMT) and silencing of CeA neurons suggest a strong  
279 correlation between CART activity in the CeA, activation of vBNST and  
280 expression of TMT-induced fear. The strength of CART signaling in the CeA  
281 appears to regulate the intensity of vBNST activation, in turn, gating the  
282 expression of innate fear. The intensification of TMT-induced freezing in  
283 response to exogenous CART peptide is in line with previous experiments  
284 using a live cat as the fear-inducing cue (Upadhyaya et al., 2013).

### 285 **3.3. NMDA-R activity in the CeA mediates TMT-induced fear processing**

286 With a view to test the involvement of glutamatergic signaling in the CeA in  
287 TMT-induced fear, we blocked the NMDA-R activity with MK801, a non-  
288 competitive antagonist of NMDA-R. Administration of MK801 directly into the  
289 CeA, attenuated the TMT-induced the freezing response (Fig 4A;  $p = 0.0043$ ;  
290  $n = 6$ ). MK801 treated animals also showed reduced Fos expression in the  
291 vBNST, compared to aCSF controls (Fig 4B-F;  $p = 0.0087$ ;  $n = 6$ ). The results  
292 underscore the role of glutamatergic inputs, acting via NMDA-R, in conveying  
293 the fear information over the CeA-vBNST circuit.

### 294 **3.4. CART function in the CeA is mediated by NMDA-R signaling**

295 Based on the above results, we next tested if fear intensification by  
296 exogenous CART peptide is mediated by NMDA-R signaling. Animals  
297 pretreated with MK801 in the CeA were evaluated for fear potentiation by  
298 exogenous CART. CART peptide induced increase in freezing, in response to  
299 TMT, was attenuated in MK801 pretreated animal (Fig 5A;  $p = 0.0043$ ;  $n = 6$ ).  
300 However, vehicle control failed to attenuate the CART peptide augmented

301 response to TMT. Increased expression of Fos in the vBNST, following CART  
302 peptide infusion and TMT exposure, was also attenuated upon blocking  
303 NMDA-R by MK801 (Fig 5B-F;  $p = 0.0022$ ;  $n = 6$ ).

304 Taken together, these results suggest that CART activity increases the  
305 excitatory drive from CeA to vBNST via potentiation of the NMDA-R activity.  
306 Modulation of vBNST activation by CART signaling in the CeA regulated the  
307 intensity of TMT-induced freezing behavior.

308

## 309 **4. Discussion**

310 TMT has been widely used to investigate the processing of innate and  
311 unconditioned fear. It serves as a reliable, unimodal and ethologically relevant  
312 odorant cue that induces fear in rodents. Fear can be quantified in terms of  
313 time the animal shows freezing in response to TMT. In this study, we use TMT  
314 to characterize the modulation of innate fear by CART neuropeptide.

### 315 **4.1. CART mediated modulation of the CeA-vBNST axis is central to** 316 **innate fear**

317 The role of specific amygdalar subregions is well characterized in conditioned  
318 fear but not for innate fear. Excitotoxic lesions of the basal (BA) and lateral  
319 (LA) nuclei of the amygdala did not affect TMT-induced freezing (Wallace and  
320 Rosen, 2001). However, muscimol based inactivation revealed the  
321 involvement of the basolateral (BLA) and medial amygdala (MeA) (Muller and  
322 Fendt, 2006), but not of the LA (Fendt et al., 2003). The amygdalar cortex  
323 (CoA) has also been implicated in fear response to TMT (Root et al., 2014).  
324 Further downstream, the role of CeA in TMT- and cat-induced fear has been  
325 demonstrated in the context of CART neuropeptide signaling (Sharma et al.,  
326 2014; Upadhyaya et al., 2013).

327 Elevated expression of Fos protein, c-fos mRNA and early growth response 1  
328 (egr-1) mRNA in response to TMT was reported in the rat CeA (Asok et al.,  
329 2013; Sharma et al., 2014). These studies also showed increased CART and  
330 CRH expression in the CeA underscoring a functional role of CeA in TMT-  
331 induced fear processing. On similar lines, ferret odor increased CRH and c-  
332 fos expression in the rat CeA (Butler et al., 2011; Merali et al., 2001).

333 The BNST is a major downstream target of the CeA neurons (Sah et al.,  
334 2003; Shackman and Fox, 2016). Several studies have implicated the BNST  
335 as a central node in processing innate fear. The neurons of the BNST showed  
336 Fos induction on exposure of the rat to predator cues, including TMT (Asok et  
337 al., 2013; Campeau et al., 2008; Day et al., 2004; Dielenberg et al., 2001;  
338 Figueiredo et al., 2003; Janitzky et al., 2009; Masini et al., 2005; McGregor et  
339 al., 2004; Sharma et al., 2014). Inactivation of the vBNST by muscimol or  
340 norepinephrine antagonists attenuated TMT-induced fear response (Fendt et  
341 al., 2003; Fendt et al., 2005). Induction of Fos mRNA in the dBNST in  
342 response to TMT has been previously reported (Asok et al., 2013). In our  
343 studies, application of CART peptide in the CeA in the absence of TMT,  
344 increased Fos expression in the CeA and vBNST but not in the dBNST. While  
345 multiple sub-regions of the BNST may be involved in fear processing, our  
346 study focused on the vBNST as the CeA-vBNST axis is subject to CART-  
347 mediated modulation.

348 The CART peptide is abundantly expressed in the neurons of the CeA while  
349 the fiber terminals are seen in the vBNST (Sharma et al., 2014; Upadhyya et  
350 al., 2013). The capsular CeA and lateral CeA contains CART-positive soma  
351 while the medial CeA is devoid of CART-containing cells. However, all three  
352 subdivisions of the CeA are rich in CART-positive fibres (Supplementary Fig  
353 S2). In the above studies, immunoneutralisation of the CART activity in the  
354 CeA was used to demonstrate a functional role for CART in processing innate  
355 fear. Further, Fos induction was seen in the CeA as well as vBNST in  
356 response to TMT (Sharma et al., 2014). In the present study,  
357 immunoneutralization of endogenous CART at the CeA not only reduced the

358 freezing response to TMT but also attenuated the vBNST activation. To  
359 underscore the causality of CART activity in inducing freezing, within the  
360 framework of the CeA-vBNST, we show that exogenously administered CART  
361 intensifies the behavioral response to TMT and concomitantly augments  
362 vBNST activation. Further, silencing of the CeA neurons by lidocaine not only  
363 attenuated the freezing response to TMT, but also reduced Fos expression in  
364 the vBNST. Collectively, the data suggest that the CeA-vBNST axis is central  
365 to TMT-induced fear processing. CART signaling modulates the activity of the  
366 CeA neurons, which in turn, regulates vBNST activation and fear expression.

367 In principle, unilateral manipulation of the CeA could be used to further dissect  
368 the CeA-vBNST circuit. However, the CeA may project to both the ipsilateral  
369 and contralateral vBNSTs (Oler et al., 2017) and may confound the analysis.

370 The detailed connectivity of the CART-modulated CeA-vBNST module is  
371 currently unclear. Given that most CeA-vBNST projections are GABA-ergic  
372 (Crestani et al., 2013; Dong et al., 2001), the occurrence of monosynaptic  
373 connectivity appears unlikely to explain the one to one activity  
374 correspondence observed in our studies between CeA and vBNST.

375 Disinhibition via an intermediate interneuron is an alternative, though this is  
376 yet to be experimentally determined. A major limitation in mapping the CART-  
377 responsive circuitry is the elusive identity of the CART receptor/s.

378 The CeA-vBNST circuit identified in this study may be an integral component  
379 of information flow from the CoA/MeA to the hypothalamus and PAG. It has  
380 been shown that the BNST sends afferents to the PAG passing through the  
381 anterior hypothalamic nucleus and ventromedial hypothalamus (Dong and  
382 Swanson, 2004, 2006). The CeA may have other parallel outputs including

383 direct afferents to the PAG and the laterodorsal tegmental area, both of which  
384 are involved in TMT-induced fear (Kessler et al., 2012; Vianna and Brandao,  
385 2003; Yang et al., 2016). This study, together with the previous implication of  
386 BNST in TMT-induced fear responses (Fendt et al., 2003; Fendt et al., 2005)  
387 emphasizes the CeA-vBNST route as one of the important outputs of the  
388 CeA.

389 In order to understand the CeA-BNST CART circuitry in greater mechanistic  
390 detail, high resolution mapping of CART inputs to the CeA and of the  
391 projections of the CART-responsive CeA neurons to the sub-regions of the  
392 BNST needs to be undertaken in the future. Similarly, specific manipulation of  
393 the activity of CART-responsive CeA neurons will circumvent the relatively  
394 coarse (spatially) stereotaxy-mediated drug/immunoneutralization  
395 approaches. Both these endeavours will benefit immensely from cell type  
396 specific transgenic driver lines that will allow regulated expression of tracer  
397 molecules or chemo/optogenetic reagents. The choice of the transgenic lines  
398 will depend upon the identification of the specific cell types in the CeA that  
399 express and/or respond to CART.

#### 400 **4.2. CART signaling in the CeA**

401 Our data indicate that CART-signaling modulates the activity of CeA neurons,  
402 which, via the vBNST, regulates expression of innate fear. To investigate the  
403 mechanism of CART activity in the CeA we investigated the role of NMDA-R-  
404 mediated glutamatergic signaling in the CeA neurons. Our results suggest  
405 that CART-mediated intensification of the fear response to TMT and  
406 augmented activation of the vBNST, are mediated through NMDA-R activity.  
407 Consistent with our observation, in mice, a significant proportion of CeA

408 neurons projecting to the vBNST express the NMDA-R in their somato-  
409 dendritic compartments (Beckerman and Glass, 2012). Morphine-induced  
410 induction of cFos in vBNST neurons is blocked when NMDA-R is genetically  
411 silenced in the CeA, implicating functional connectivity between the NMDA-R  
412 expressing CeA neurons and the vBNST (Beckerman and Glass, 2012).

413 It remains unclear whether CART function at the CeA is pre- or postsynaptic.  
414 Again, the identification of the CART receptor/s remains a major hurdle in  
415 answering this question. CART has been previously found to potentiate  
416 NMDA-R activity by promoting phosphorylation of the NR1 subunit in sensory  
417 neurons suggesting a postsynaptic function (Chiu et al., 2010). In our studies,  
418 injection of CART peptide in the CeA was sufficient to increase Fos induction  
419 in both the CeA and vBNST suggesting an enhancement of the baseline  
420 excitatory glutamatergic drive in the CeA.

## 421 **5. Conclusion**

422 The CeA-vBNST axis is emerging as a major neural substrate encoding  
423 negative valence in physiological and behavioral responses to stress (Avery  
424 et al., 2016; Fox et al., 2015; Shackman and Fox, 2016). Our study identifies  
425 CART signaling as a major modulator of innate fear gating the information  
426 flow in the CeA-vBNST circuit. These studies define a novel mechanistic  
427 framework in our understanding of survival instincts subserved by hard-wired  
428 circuitry subject to peptidergic modulation.

429

430 **FUNDING AND DISCLOSURE**

431 This work was supported by the Department of Biotechnology (DBT), Govt. of  
432 India (Grant No.: BT/PR14253/Med/30/432/2010) and the Science and  
433 Engineering Research Board (SERB), Govt. of India (Grant No.:  
434 EMR/2015/000565).

435 The authors declare no competing financial interests.

436

437 **ACKNOWLEDGEMENTS**

438 We thank Ms. Geetanjali Nerurkar for maintaining the SD rat colonies. We  
439 acknowledge the IISER Pune Microscopy Facility and the National Facility for  
440 Gene Function in Health and Disease (NFGFHD) at IISER Pune for providing  
441 access to equipment and infrastructure.

442



## 443 REFERENCES

- 444 Asok, A., Ayers, L.W., Awoyemi, B., Schulkin, J., Rosen, J.B., 2013.  
445 Immediate early gene and neuropeptide expression following exposure to the  
446 predator odor 2,5-dihydro-2,4,5-trimethylthiazoline (TMT). *Behav Brain Res*  
447 248, 85-93.
- 448 Asok, A., Schulkin, J., Rosen, J.B., 2016. Corticotropin releasing factor type-1  
449 receptor antagonism in the dorsolateral bed nucleus of the stria terminalis  
450 disrupts contextually conditioned fear, but not unconditioned fear to a predator  
451 odor. *Psychoneuroendocrinology* 70, 17-24.
- 452 Avery, S.N., Clauss, J.A., Blackford, J.U., 2016. The Human BNST:  
453 Functional Role in Anxiety and Addiction. *Neuropsychopharmacology* 41, 126-  
454 141.
- 455 Beckerman, M.A., Glass, M.J., 2012. The NMDA-NR1 receptor subunit and  
456 the mu-opioid receptor are expressed in somatodendritic compartments of  
457 central nucleus of the amygdala neurons projecting to the bed nucleus of the  
458 stria terminalis. *Exp Neurol* 234, 112-126.
- 459 Brechbuhl, J., Moine, F., Klaey, M., Nenniger-Tosato, M., Hurni, N., Sporkert,  
460 F., Giroud, C., Broillet, M.C., 2013. Mouse alarm pheromone shares structural  
461 similarity with predator scents. *Proc Natl Acad Sci U S A* 110, 4762-4767.
- 462 Butler, R.K., Sharko, A.C., Oliver, E.M., Brito-Vargas, P., Kaigler, K.F., Fadel,  
463 J.R., Wilson, M.A., 2011. Activation of phenotypically-distinct neuronal  
464 subpopulations of the rat amygdala following exposure to predator odor.  
465 *Neuroscience* 175, 133-144.
- 466 Campeau, S., Nyhuis, T.J., Sasse, S.K., Day, H.E., Masini, C.V., 2008. Acute  
467 and chronic effects of ferret odor exposure in Sprague-Dawley rats. *Neurosci*  
468 *Biobehav Rev* 32, 1277-1286.
- 469 Chiu, H.Y., Lin, H.H., Lai, C.C., 2010. Cocaine- and amphetamine-regulated  
470 transcript (CART) peptide activates ERK pathways via NMDA receptors in rat  
471 spinal cord dorsal horn in an age-dependent manner. *Regul Pept* 164, 90-96.
- 472 Crestani, C.C., Alves, F.H., Gomes, F.V., Resstel, L.B., Correa, F.M.,  
473 Herman, J.P., 2013. Mechanisms in the bed nucleus of the stria terminalis  
474 involved in control of autonomic and neuroendocrine functions: a review. *Curr*  
475 *Neuropharmacol* 11, 141-159.
- 476 Davis, M., Whalen, P.J., 2001. The amygdala: vigilance and emotion. *Mol*  
477 *Psychiatry* 6, 13-34.
- 478 Day, H.E., Masini, C.V., Campeau, S., 2004. The pattern of brain c-fos mRNA  
479 induced by a component of fox odor, 2,5-dihydro-2,4,5-trimethylthiazoline  
480 (TMT), in rats, suggests both systemic and processive stress characteristics.  
481 *Brain Res* 1025, 139-151.
- 482 Dielenberg, R.A., Hunt, G.E., McGregor, I.S., 2001. "When a rat smells a cat":  
483 the distribution of Fos immunoreactivity in rat brain following exposure to a  
484 predatory odor. *Neuroscience* 104, 1085-1097.

- 485 Dong, H.W., Petrovich, G.D., Swanson, L.W., 2001. Topography of  
486 projections from amygdala to bed nuclei of the stria terminalis. *Brain Res*  
487 *Brain Res Rev* 38, 192-246.
- 488 Dong, H.W., Swanson, L.W., 2004. Organization of axonal projections from  
489 the anterolateral area of the bed nuclei of the stria terminalis. *J Comp Neurol*  
490 468, 277-298.
- 491 Dong, H.W., Swanson, L.W., 2006. Projections from bed nuclei of the stria  
492 terminalis, dorsomedial nucleus: implications for cerebral hemisphere  
493 integration of neuroendocrine, autonomic, and drinking responses. *J Comp*  
494 *Neurol* 494, 75-107.
- 495 Fendt, M., Endres, T., Apfelbach, R., 2003. Temporary inactivation of the bed  
496 nucleus of the stria terminalis but not of the amygdala blocks freezing induced  
497 by trimethylthiazoline, a component of fox feces. *J Neurosci* 23, 23-28.
- 498 Fendt, M., Siegl, S., Steiniger-Brach, B., 2005. Noradrenaline transmission  
499 within the ventral bed nucleus of the stria terminalis is critical for fear behavior  
500 induced by trimethylthiazoline, a component of fox odor. *J Neurosci* 25, 5998-  
501 6004.
- 502 Figueiredo, H.F., Bodie, B.L., Tauchi, M., Dolgas, C.M., Herman, J.P., 2003.  
503 Stress integration after acute and chronic predator stress: differential  
504 activation of central stress circuitry and sensitization of the hypothalamo-  
505 pituitary-adrenocortical axis. *Endocrinology* 144, 5249-5258.
- 506 Fox, A.S., Oler, J.A., Tromp do, P.M., Fudge, J.L., Kalin, N.H., 2015.  
507 Extending the amygdala in theories of threat processing. *Trends Neurosci* 38,  
508 319-329.
- 509 Isosaka, T., Matsuo, T., Yamaguchi, T., Funabiki, K., Nakanishi, S.,  
510 Kobayakawa, R., Kobayakawa, K., 2015. Htr2a-Expressing Cells in the  
511 Central Amygdala Control the Hierarchy between Innate and Learned Fear.  
512 *Cell* 163, 1153-1164.
- 513 Janitzky, K., Stork, O., Lux, A., Yanagawa, Y., Schwegler, H., Linke, R., 2009.  
514 Behavioral effects and pattern of brain c-fos mRNA induced by 2,5-dihydro-  
515 2,4,5-trimethylthiazoline, a component of fox feces odor in GAD67-GFP  
516 knock-in C57BL/6 mice. *Behav Brain Res* 202, 218-224.
- 517 Kalin, N.H., Shelton, S.E., Davidson, R.J., 2004. The role of the central  
518 nucleus of the amygdala in mediating fear and anxiety in the primate. *J*  
519 *Neurosci* 24, 5506-5515.
- 520 Kessler, M.S., Debilly, S., Schoppenthau, S., Bielser, T., Bruns, A., Kunnecke,  
521 B., Kienlin, M., Wettstein, J.G., Moreau, J.L., Risterucci, C., 2012. fMRI  
522 fingerprint of unconditioned fear-like behavior in rats exposed to  
523 trimethylthiazoline. *Eur Neuropsychopharmacol* 22, 222-230.
- 524 Kobayakawa, K., Kobayakawa, R., Matsumoto, H., Oka, Y., Imai, T., Ikawa,  
525 M., Okabe, M., Ikeda, T., Itohara, S., Kikusui, T., Mori, K., Sakano, H., 2007.  
526 Innate versus learned odour processing in the mouse olfactory bulb. *Nature*  
527 450, 503-508.
- 528 Kokare, D.M., Shelkar, G.P., Borkar, C.D., Nakhate, K.T., Subhedar, N.K.,  
529 2011. A simple and inexpensive method to fabricate a cannula system for

- 530 intracranial injections in rats and mice. *J Pharmacol Toxicol Methods* 64, 246-  
531 250.
- 532 Masini, C.V., Sauer, S., Campeau, S., 2005. Ferret odor as a processive  
533 stress model in rats: neurochemical, behavioral, and endocrine evidence.  
534 *Behav Neurosci* 119, 280-292.
- 535 Matsumoto, H., Kobayakawa, K., Kobayakawa, R., Tashiro, T., Mori, K.,  
536 Sakano, H., Mori, K., 2010. Spatial arrangement of glomerular molecular-  
537 feature clusters in the odorant-receptor class domains of the mouse olfactory  
538 bulb. *J Neurophysiol* 103, 3490-3500.
- 539 McGregor, I.S., Hargreaves, G.A., Apfelbach, R., Hunt, G.E., 2004. Neural  
540 correlates of cat odor-induced anxiety in rats: region-specific effects of the  
541 benzodiazepine midazolam. *J Neurosci* 24, 4134-4144.
- 542 Merali, Z., Kent, P., Michaud, D., McIntyre, D., Anisman, H., 2001. Differential  
543 impact of predator or immobilization stressors on central corticotropin-  
544 releasing hormone and bombesin-like peptides in Fast and Slow seizing rat.  
545 *Brain Res* 906, 60-73.
- 546 Motta, S.C., Goto, M., Gouveia, F.V., Baldo, M.V., Canteras, N.S., Swanson,  
547 L.W., 2009. Dissecting the brain's fear system reveals the hypothalamus is  
548 critical for responding in subordinate conspecific intruders. *Proc Natl Acad Sci*  
549 *U S A* 106, 4870-4875.
- 550 Muller, M., Fendt, M., 2006. Temporary inactivation of the medial and  
551 basolateral amygdala differentially affects TMT-induced fear behavior in rats.  
552 *Behav Brain Res* 167, 57-62.
- 553 Nanda, S.A., Qi, C., Roseboom, P.H., Kalin, N.H., 2008. Predator stress  
554 induces behavioral inhibition and amygdala somatostatin receptor 2 gene  
555 expression. *Genes Brain Behav* 7, 639-648.
- 556 Oler, J.A., Tromp, D.P., Fox, A.S., Kovner, R., Davidson, R.J., Alexander,  
557 A.L., McFarlin, D.R., Birn, R.M., B, E.B., deCampo, D.M., Kalin, N.H., Fudge,  
558 J.L., 2017. Connectivity between the central nucleus of the amygdala and the  
559 bed nucleus of the stria terminalis in the non-human primate: neuronal tract  
560 tracing and developmental neuroimaging studies. *Brain Struct Funct* 222, 21-  
561 39.
- 562 Pagani, J.H., Rosen, J.B., 2009. The medial hypothalamic defensive circuit  
563 and 2,5-dihydro-2,4,5-trimethylthiazoline (TMT) induced fear: comparison of  
564 electrolytic and neurotoxic lesions. *Brain Res* 1286, 133-146.
- 565 Root, C.M., Denny, C.A., Hen, R., Axel, R., 2014. The participation of cortical  
566 amygdala in innate, odour-driven behaviour. *Nature* 515, 269-273.
- 567 Roseboom, P.H., Nanda, S.A., Bakshi, V.P., Trentani, A., Newman, S.M.,  
568 Kalin, N.H., 2007. Predator threat induces behavioral inhibition, pituitary-  
569 adrenal activation and changes in amygdala CRF-binding protein gene  
570 expression. *Psychoneuroendocrinology* 32, 44-55.
- 571 Rosen, J.B., Asok, A., Chakraborty, T., 2015. The smell of fear: innate threat  
572 of 2,5-dihydro-2,4,5-trimethylthiazoline, a single molecule component of a  
573 predator odor. *Front Neurosci* 9, 292.

- 574 Sah, P., Faber, E.S., Lopez De Armentia, M., Power, J., 2003. The  
575 amygdaloid complex: anatomy and physiology. *Physiol Rev* 83, 803-834.
- 576 Schulkin, J., Morgan, M.A., Rosen, J.B., 2005. A neuroendocrine mechanism  
577 for sustaining fear. *Trends Neurosci* 28, 629-635.
- 578 Shackman, A.J., Fox, A.S., 2016. Contributions of the Central Extended  
579 Amygdala to Fear and Anxiety. *J Neurosci* 36, 8050-8063.
- 580 Sharma, A., Rale, A., Utturwar, K., Ghose, A., Subhedar, N., 2014.  
581 Identification of the CART neuropeptide circuitry processing TMT-induced  
582 predator stress. *Psychoneuroendocrinology* 50, 194-208.
- 583 Shionoya, K., Hegoburu, C., Brown, B.L., Sullivan, R.M., Doyere, V., Mouly,  
584 A.M., 2013. It's time to fear! Interval timing in odor fear conditioning in rats.  
585 *Front Behav Neurosci* 7, 128.
- 586 Silva, B.A., Gross, C.T., Graff, J., 2016. The neural circuits of innate fear:  
587 detection, integration, action, and memorization. *Learn Mem* 23, 544-555.
- 588 Spannuth, B.M., Hale, M.W., Evans, A.K., Lukkes, J.L., Campeau, S., Lowry,  
589 C.A., 2011. Investigation of a central nucleus of the amygdala/dorsal raphe  
590 nucleus serotonergic circuit implicated in fear-potentiated startle.  
591 *Neuroscience* 179, 104-119.
- 592 Takahashi, L.K., 2014. Olfactory systems and neural circuits that modulate  
593 predator odor fear. *Front Behav Neurosci* 8, 72.
- 594 Tasan, R.O., Verma, D., Wood, J., Lach, G., Horner, B., de Lima, T.C.,  
595 Herzog, H., Sperk, G., 2016. The role of Neuropeptide Y in fear conditioning  
596 and extinction. *Neuropeptides* 55, 111-126.
- 597 Upadhyaya, M.A., Kokare, D.M., Subhedar, N.K., 2013. Cocaine- and  
598 amphetamine-regulated transcript peptide (CART) in the central nucleus of  
599 amygdala potentiates behavioral and hormonal responses of the rat exposed  
600 to its predator. *Behav Brain Res* 243, 129-137.
- 601 Vianna, D.M., Brandao, M.L., 2003. Anatomical connections of the  
602 periaqueductal gray: specific neural substrates for different kinds of fear. *Braz*  
603 *J Med Biol Res* 36, 557-566.
- 604 Wallace, K.J., Rosen, J.B., 2001. Neurotoxic lesions of the lateral nucleus of  
605 the amygdala decrease conditioned fear but not unconditioned fear of a  
606 predator odor: comparison with electrolytic lesions. *J Neurosci* 21, 3619-3627.
- 607 Wilson, M.A., Junor, L., 2008. The role of amygdalar mu-opioid receptors in  
608 anxiety-related responses in two rat models. *Neuropsychopharmacology* 33,  
609 2957-2968.
- 610 Yang, H., Yang, J., Xi, W., Hao, S., Luo, B., He, X., Zhu, L., Lou, H., Yu, Y.Q.,  
611 Xu, F., Duan, S., Wang, H., 2016. Laterodorsal tegmentum interneuron  
612 subtypes oppositely regulate olfactory cue-induced innate fear. *Nat Neurosci*  
613 19, 283-289.
- 614
- 615

616 **FIGURE LEGENDS**

617 **Figure 1** CeA mediates TMT-induced freezing and activation of the vBNST  
618 neurons. The effects of intra-CeA administration of buffered saline or lidocaine  
619 on percent time spent freezing (A) and the number of Fos-positive cells in the  
620 vBNST (B) following TMT exposure are represented as means  $\pm$  SEM.  
621 Representative micrographs of the vBNST region from saline (C-D) and  
622 Lidocaine (E-F) injected animals showing Fos staining (C,E) and overlay (D,F)  
623 of Fos (green; arrowheads) and DAPI (blue). ac, anterior commissure. The  
624 data were analyzed by Mann-Whitney test.  $N = 6$  animals in each group. \*\*  $p$   
625  $< 0.01$ . Scale bar: 50  $\mu\text{m}$ , (C) - (F); 20  $\mu\text{m}$ , insets.

626  
627 **Figure 2** CART signaling in the CeA regulates TMT-induced freezing and  
628 activation of the vBNST neurons. The effects of intra-CeA administration of  
629 non-immune serum (NIS) or CART antibody (CART Ab) on percent time spent  
630 freezing (A) and the number of Fos-positive cells in the vBNST (B) following  
631 TMT exposure are represented as means  $\pm$  SEM. Representative  
632 micrographs of the vBNST region from NIS (C-D) and CART Ab (E-F) treated  
633 animals showing Fos staining (C,E) and overlay (D,F) of Fos (green;  
634 arrowheads) and DAPI (blue). ac, anterior commissure. The data were  
635 analyzed by Mann-Whitney test.  $N = 6$  animals in each group. \*\*  $p < 0.01$ .  
636 Scale bar: 50  $\mu\text{m}$ , (C) - (F); 20  $\mu\text{m}$ , insets.

637

638 **Figure 3** CART peptide intensifies TMT-induced freezing and activation of the  
639 vBNST and CeA neurons. The effects of intra-CeA administration of artificial  
640 cerebrospinal fluid (aCSF) or CART peptide (CARTp) on percent time spent

641 freezing (A) and the number of Fos-positive cells in the vBNST (B) following  
642 TMT exposure are represented as means  $\pm$  SEM. aCSF or CARTp were  
643 administered 15 min prior to TMT exposure. Representative micrographs of  
644 the vBNST region from aCSF (C-D) and CARTp (E-F) injected animals  
645 showing Fos staining (C, E) and overlay (D, F) of Fos (green; arrowheads)  
646 and DAPI (blue). ac, anterior commissure. Intra-CeA administration of CARTp  
647 in anesthetized rats, not exposed to TMT, on the number Fos-positive cells in  
648 the CeA (G), vBNST (H) and dBNST (I). The data were analyzed by Mann-  
649 Whitney test.  $N = 6$  animals in each group (A-B) and  $N = 6$  amygdalae in each  
650 group (G-I). \*\*  $p < 0.01$ . Scale bar: 50  $\mu\text{m}$ , (C) - (F); 20  $\mu\text{m}$ , insets.

651

652 **Figure 4** NMDA-R signaling in the CeA mediates TMT-induced freezing and  
653 activation of the vBNST neurons. The effects of intra-CeA administration of  
654 artificial cerebrospinal fluid (aCSF) or MK801 on percent time spent freezing  
655 (A) and the number of Fos-positive cells in the vBNST (B) following TMT  
656 exposure are represented as means  $\pm$  SEM. The agents were administered 5  
657 mins prior to TMT exposure. Representative micrographs of the vBNST region  
658 from aCSF (C-D) and MK801 (E-F) treated animals showing Fos staining (C,  
659 E) and overlay (D, F) of Fos (green; arrowheads) and DAPI (blue). ac, anterior  
660 commissure. The data were analyzed by Mann-Whitney test.  $N = 6$  in each  
661 group. \*\*  $p < 0.01$ . Scale bar: 50  $\mu\text{m}$ , (C) - (F); 20  $\mu\text{m}$ , insets.

662

663 **Figure 5** CART activity in the CeA mediates TMT-induced freezing and  
664 activation of the vBNST neurons via NMDA-R signaling. The effects of intra-



665 CeA administration of artificial cerebrospinal fluid (aCSF) or MK801 followed  
666 by CARTp on percent time spent freezing (A) and the number of Fos-positive  
667 cells in the vBNST (B) following TMT exposure are represented as means  $\pm$   
668 SEM. MK801 or aCSF was administered 15 mins prior to CARTp, followed by  
669 TMT exposure after another 5 mins. Representative micrographs of the  
670 vBNST region from aCSF + CARTp (C-D) and MK801 + CARTp (E-F) injected  
671 animals showing Fos staining (C, E) and overlay (D, F) of Fos (green;  
672 arrowheads) and DAPI (blue). ac, anterior commissure. The data were  
673 analyzed by Mann-Whitney test.  $N = 6$  in each group. \*\*  $p < 0.01$ . Scale bar:  
674 50  $\mu\text{m}$ , (C) - (F); 20  $\mu\text{m}$ , insets.

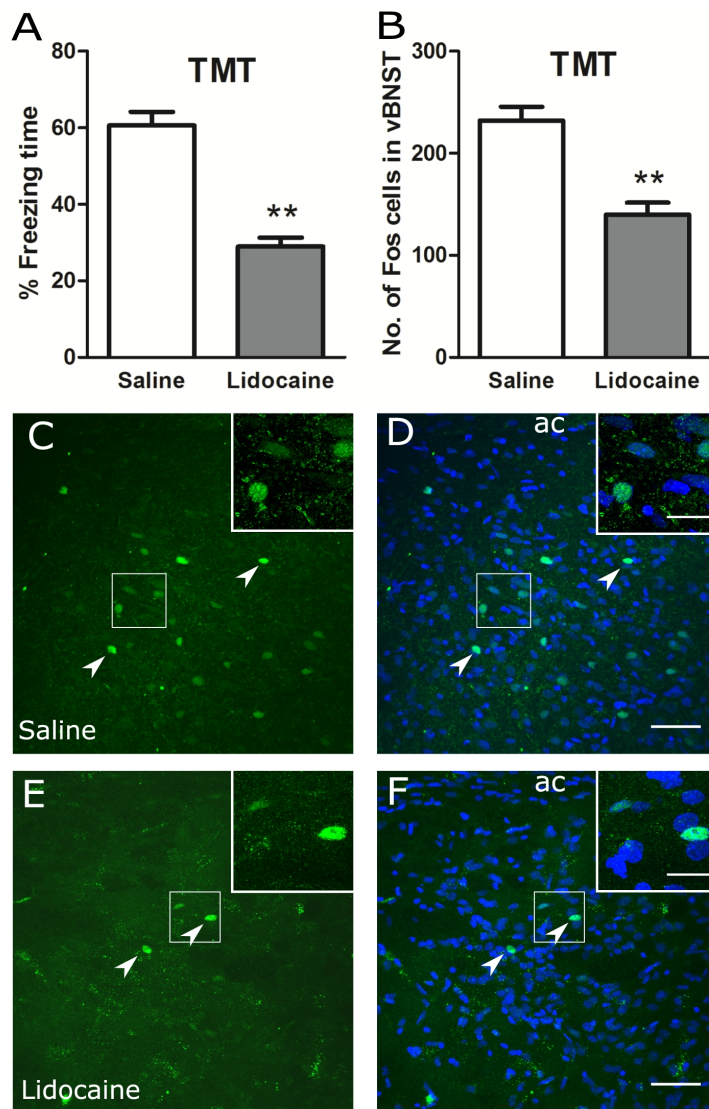

Figure 1



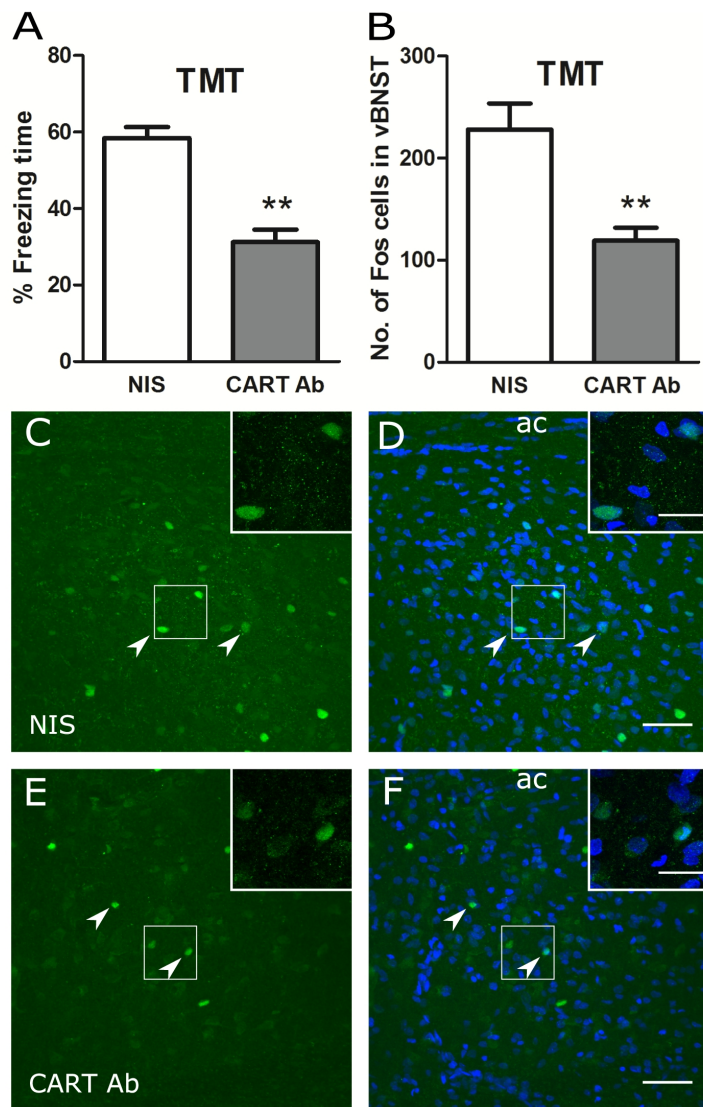

Figure 2

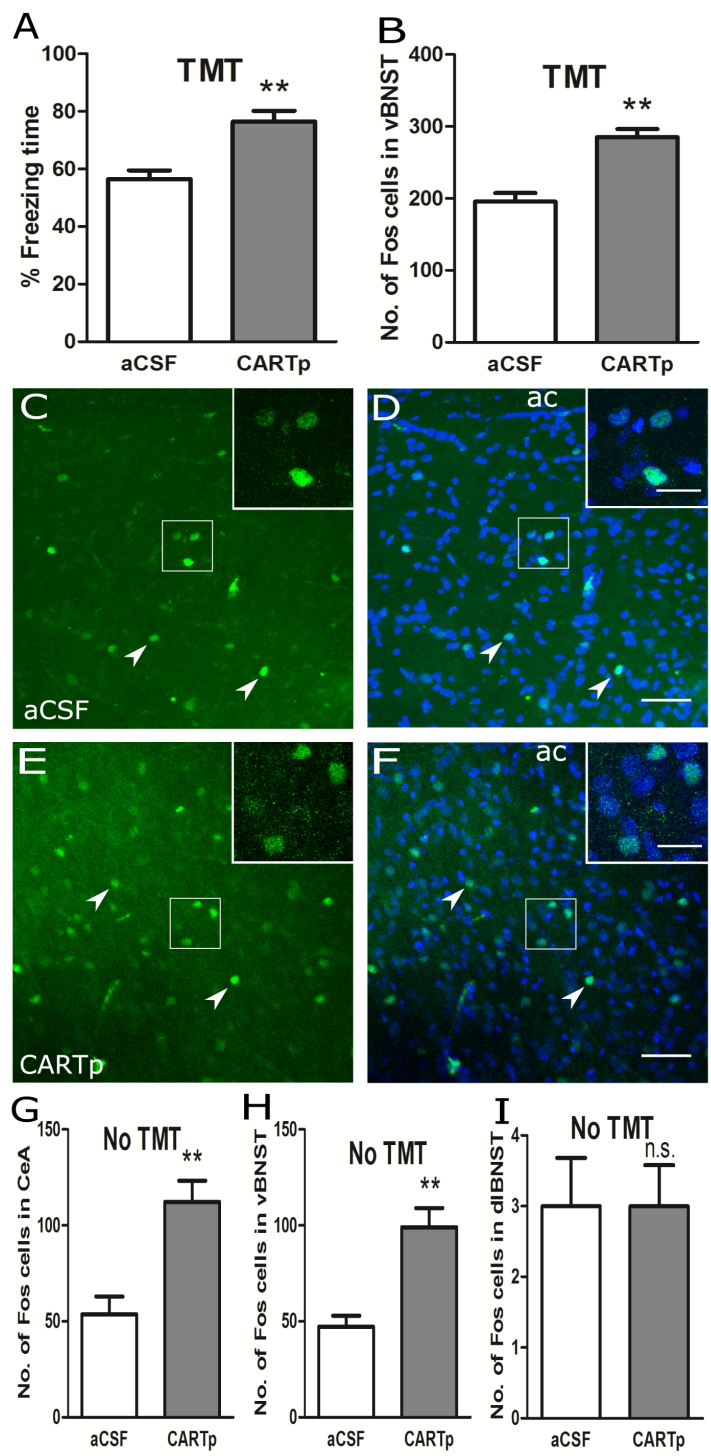

Figure 3

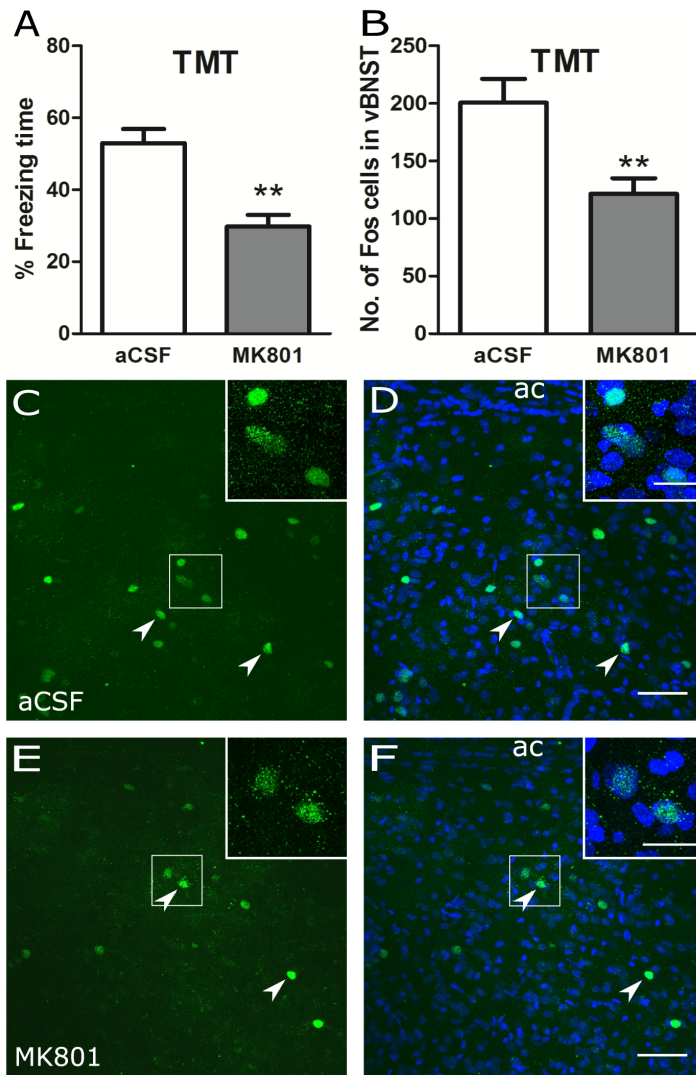

Figure 4

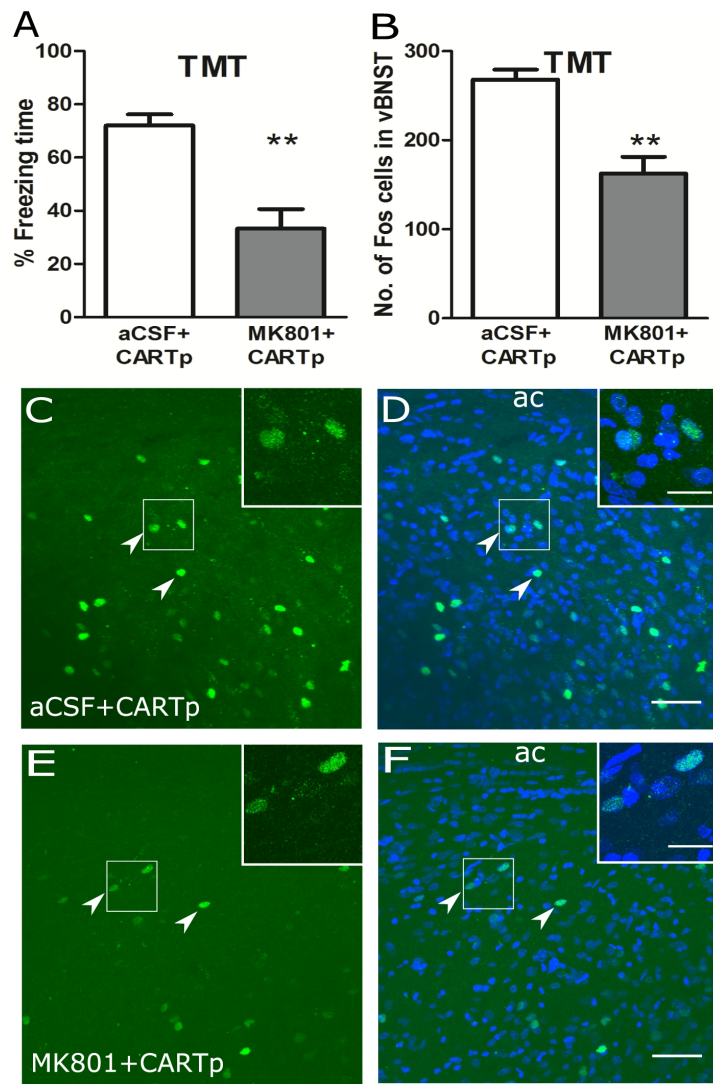

Figure 5
